# Supplementary material for: Defective anchoring of JNK1 in the cytoplasm by MKK7 in Jurkat cells is associated with resistance to Fas-mediated apoptosis
Source: PubMed Central journal article supplement — Mol Biol Cell. 2011 Jan 1;22(1):117–27. doi: 10.1091/mbc.E10-06-0492 (PMC3016969; doi:10.1091/mbc.e10-06-0492), 2011-01-01
Supplement: E10-06-0492_1.pdf [file E10-06-0492_1.pdf]

## SUPPLEMENTAL MATERIAL

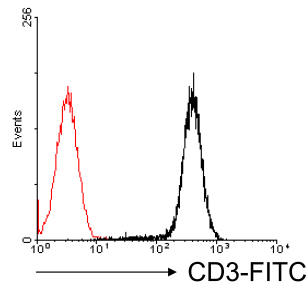

**Figure S1.** Analysis of the purity of human PBMC T cells obtained.  $1 \times 10^5$  cells were used per sample. The cells were washed with FACS washing buffer (2 % FBS, 0.1 %  $\text{NaN}_3$  in PBS) twice, then incubated with FITC-labeled antibody against human CD3 for 25 min at 4 °C, isotype antibody was included as negative control. After washing with FACS buffer, the cells were fixed with 1 % (w/v) paraformaldehyde in PBS and preserved at 4 °C. Flow cytometry was carried out on a Becton–Dickinson FACSCalibur machine (BD Biosciences, Franklin Lakes, NJ).

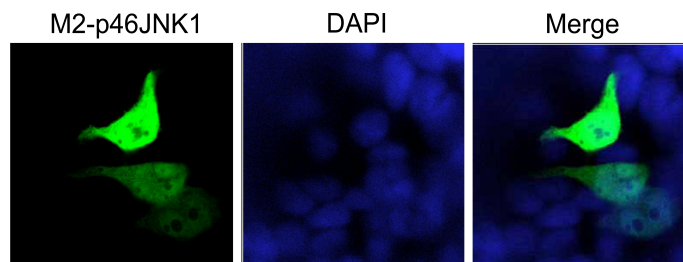

**Figure S2.** The subcellular localization of M2-p46JNK1 in resting 293T cells was examined by indirect immunofluorescence staining with an antibody against FLAG-tag (M2).

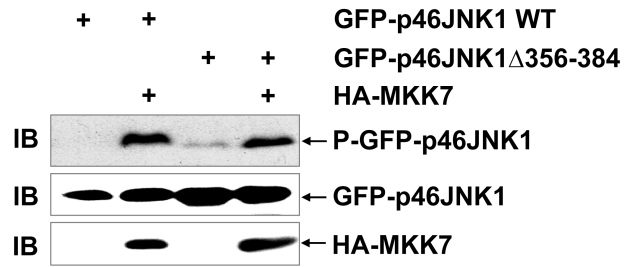

**Figure S3.** The phosphorylation of GFP-p46JNK1 WT and GFP-p46JNK1 $\Delta$ 356-384 with or without HA-MKK7 WT co-expression in 293T cells was analyzed by immunoblotting.

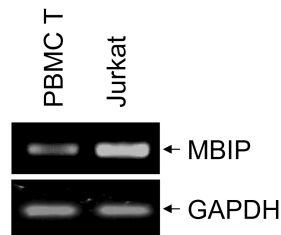

**Figure S4.** The expression of MBIP in human PBMC T cells and Jurkat cells was analyzed by RT-PCR. RNA extraction and subsequent RT-PCR were performed as previously described (Zhang *et al.*, J Immunol 2010; 185: 3554-3563). The primer pair for *MBIP* amplification was designed based on nucleotides 131 to 151 and 376 to 396 relative to the translation start site: 5'-TTGACCTCAGAGATGATGTGG-3' and 5'-TTCTTTGTGCTTTTCTTCCTC-3'.
